# Supplementary material
Source: ML conference proceedings conference paper supplement (https://proceedings.mlr.press/v119/feng20c.html)
Supplement: Supplementary file 1 [file feng20c-supp.pdf]

# The Intrinsic Robustness of Stochastic Bandits to Strategic Manipulation

## Appendix

### A. Useful Definitions and Inequalities

**Definition A.1** ( $\sigma$ -sub-Gaussian). A random variable  $X \in \mathbb{R}$  is said to be sub-Gaussian with variance proxy  $\sigma^2$  if  $\mathbb{E}[X] = \mu$  and satisfies,

$$\mathbb{E}[\exp(s(X - \mu))] \leq \exp\left(\frac{\sigma^2 s^2}{2}\right), \forall s \in \mathbb{R}$$

Note the distribution defined on  $[0, 1]$  is a special case of  $1/2$ -sub-Gaussian.

**Fact A.2.** Let  $X_1, X_2, \dots, X_n$  i.i.d drawn from a  $\sigma$ -sub-Gaussian,  $\bar{X} = \frac{1}{n} \sum_{i=1}^n X_i$  and  $\mathbb{E}[X]$  be the mean, then

$$\mathbb{P}(\bar{X} - \mathbb{E}[X] \geq a) \leq e^{-na^2/2\sigma^2} \quad \text{and} \quad \mathbb{P}(\bar{X} - \mathbb{E}[X] \leq -a) \leq e^{-na^2/2\sigma^2}$$

**Fact A.3** (Harmonic Sequence Bound). For  $t_2 > t_1 \geq 2$ , we have

$$\ln \frac{t_2}{t_1} \leq \sum_{t=t_1}^{t_2} \frac{1}{t} \leq \ln\left(\frac{t_2}{t_1 - 1}\right)$$

**Fact A.4.** For a Gaussian distributed random variable  $Z$  with mean  $\mu$  and variance  $\sigma^2$ , for any  $z$ ,

$$\mathbb{P}(|Z - \mu| > z\sigma) \leq \frac{1}{2}e^{-z^2/2}$$

**Lemma A.5** (Theorem 3 in (Auer et al., 2002a)). In  $\varepsilon$ -Greedy, for any arm  $k \in [K]$ ,  $t > K$ ,  $n \in \mathbb{N}_+$ , we have

$$\begin{aligned} \mathbb{P}\left(\hat{\mu}_k(t-1) \leq \mu_k - \frac{\Delta_k}{n}\right) &\leq x_t \cdot e^{-x_t/5} + \frac{2\sigma^2 n^2}{\Delta_k^2} e^{-\Delta_k^2 \lfloor x_t \rfloor / 2\sigma^2 n^2}, \quad \text{and} \\ \mathbb{P}\left(\hat{\mu}_{i^*}(t-1) \geq \mu_{i^*} + \frac{\Delta_k}{n}\right) &\leq x_t \cdot e^{-x_t/5} + \frac{2\sigma^2 n^2}{\Delta_k^2} e^{-\Delta_k^2 \lfloor x_t \rfloor / 2\sigma^2 n^2}, \end{aligned}$$

where  $x_t = \frac{1}{2K} \sum_{s=K+1}^t \varepsilon_s$ .

### B. Omitted Proofs in Section 3

#### B.1. Proof of Lemma 3.2

*Proof.* Let  $C_i(T) = \max\left\{\frac{81\sigma^2 \ln T}{\Delta_i^2}, \frac{3B_i}{\Delta_i}\right\}$ . By Fact A.2, we have for any  $s \geq 1$  and  $\ell \geq C_i(T)$

$$\begin{aligned} \forall k, \quad \mathbb{P}\left(\mu_k - \hat{\mu}_k(t-1) \geq 3\sigma \sqrt{\frac{\ln T}{n_k(t-1)}} \mid n_k(t-1) = s\right) &\leq \frac{1}{T^{9/2}} \\ \mathbb{P}\left(\hat{\mu}_i(t-1) - \mu_i \geq \frac{\Delta_i}{3} \mid n_i(t-1) = \ell\right) &\leq \frac{1}{T^{9/2}} \end{aligned} \tag{7}$$

We first decompose  $\mathbb{E}[n_i(T)]$  as follows,

$$\begin{aligned} \mathbb{E}[n_i(T)] &\leq 1 + \mathbb{E}\left[\sum_{t=K+1}^T \mathbb{I}\{I_t = i, n_i(t-1) \leq C_i(T)\}\right] + \mathbb{E}\left[\sum_{t=K+1}^T \mathbb{I}\{I_t = i, n_i(t-1) \geq C_i(T)\}\right] \\ &\leq 1 + C_i(T) + \mathbb{E}\left[\sum_{t=K+1}^T \mathbb{I}\{I_t = i, n_i(t-1) \geq C_i(T)\}\right] \\ &\leq 1 + C_i(T) + \sum_{t=K+1}^T \mathbb{P}\left(\text{UCB}_i(t) + \frac{\beta_{t-1}^{(i)}}{n_i(t-1)} \geq \text{UCB}_{i^*}(t), n_i(t-1) \geq C_i(T)\right) \end{aligned} \tag{8}$$

We then bound the probability  $\mathbb{P}\left(\text{UCB}_i(t) + \frac{\beta_{t-1}^{(i)}}{n_i(t-1)} \geq \text{UCB}_{i^*}(t), n_i(t-1) \geq C_i(T)\right)$  by union bound, and decompose this probability term as follows,

$$\begin{aligned} & \mathbb{P}\left(\text{UCB}_i(t) + \frac{\beta_{t-1}^{(i)}}{n_i(t-1)} \geq \text{UCB}_{i^*}(t), n_i(t-1) \geq C_i(T)\right) \\ & \leq \sum_{s=1}^{t-1} \sum_{\ell \geq C_i(T)} \mathbb{P}\left(\text{UCB}_i(t) + \frac{\beta_{t-1}^{(i)}}{n_i(t-1)} \geq \text{UCB}_{i^*}(t) \mid n_i(t-1) = \ell, n_{i^*}(t-1) = s\right). \end{aligned} \quad (9)$$

What remains is to upper bound the summand in the above term. Consider for  $1 \leq s \leq t-1$  and  $C_i(T) \leq \ell \leq t-1$ , we have

$$\begin{aligned} & \mathbb{P}\left(\text{UCB}_i(t) + \frac{\beta_{t-1}^{(i)}}{n_i(t-1)} \geq \text{UCB}_{i^*}(t) \mid n_i(t-1) = \ell, n_{i^*}(t-1) = s\right) \\ & \leq \mathbb{P}\left(\widehat{\mu}_i(t-1) + 3\sigma\sqrt{\frac{\ln T}{n_i(t-1)}} + \frac{\Delta_i}{3} \geq \widehat{\mu}_{i^*}(t-1) + 3\sigma\sqrt{\frac{\ln T}{n_{i^*}(t-1)}} \mid n_i(t-1) = \ell, n_{i^*}(t-1) = s\right) \\ & \leq \mathbb{P}\left(\widehat{\mu}_i(t-1) + \frac{\Delta_i}{3} + \frac{\Delta_i}{3} \geq \widehat{\mu}_{i^*}(t-1) + 3\sigma\sqrt{\frac{\ln T}{n_{i^*}(t-1)}} \mid n_i(t-1) = \ell, n_{i^*}(t-1) = s\right) \end{aligned}$$

The first inequality relies on the fact that  $\ell \geq C_i(T) \geq \frac{3B_i}{\Delta_i} \geq \frac{3\beta_{t-1}^{(i)}}{\Delta_i}$  and second inequality holds because  $\ell \geq C_i(T) \geq \frac{81\sigma^2 \ln T}{\Delta_i^2}$ . By union bound and Equation (7), we can further upper bound the last term in the above inequality by

$$\begin{aligned} & \mathbb{P}\left(\widehat{\mu}_i(t-1) - \mu_i \geq \frac{\Delta_i}{3} \mid n_i(t-1) = \ell\right) + \mathbb{P}\left(\mu_{i^*} - \widehat{\mu}_{i^*}(t-1) \geq 3\sigma\sqrt{\frac{\ln T}{n_{i^*}(t-1)}} \mid n_{i^*}(t-1) = s\right) \\ & \leq \frac{1}{T^{9/2}} + \frac{1}{T^{9/2}} \leq \frac{2}{T^{9/2}} \end{aligned}$$

Combining Equations (8) and the fact that

$$\sum_{t=K+1}^T \sum_{s=1}^{t-1} \sum_{\ell \geq C_i(T)} \frac{2}{t^{9/2}} \leq \sum_{t=K+1}^T \frac{2}{T^2} \leq 2,$$

we complete the proof.  $\square$

## B.2. Proof of Theorem 3.3

We begin with a few notations. Let  $I_t^S$  denote the arm being pulled at time  $t$  for any investment strategy  $S$ , and  $Z_t^S = \{I_1^S, \dots, I_t^S\}$  denote the *sequence* of arms being pulled up to time  $t$ . Note that  $Z_t^S = \{I_1^S, \dots, I_t^S\}$  can be viewed as a stochastic process for any  $t$ . Let  $S^{(-i)}$  denote the investment strategies of all arms excluding arm  $i$ . In addition, we denote by  $(\text{LSI}, S^{(-i)})$  the strategy that arm  $i$  uses LSI strategy and the other arms adopt  $S^{(-i)}$ . For each arm  $j \neq i$ ,  $S^{(j)}$  only depends on its own history, which means given fixed strategies  $S^{(-i)}$ , at any time  $t$ , each of the arms  $j \neq i$  will invest the same budget if it has been pulled the same times and the true rewards are the same up to time  $t$ .

Our proof of Theorem 3.3 relies on a carefully chosen coupling of the two stochastic processes  $Z_T^{S_1}, Z_T^{S_2}$  induced by different investment strategies  $S_1, S_2$ , respectively.

**Definition B.1 (Arm Coupling).** *Given any two investment strategies  $S_1, S_2$ , the **Arm Coupling** of  $Z_T^{S_1}$  and  $Z_T^{S_2}$  is a coupling of these two stochastic processes such that the reward of any arm  $k \in [K]$  when pulled for the same times is the same in these two random processes. In this case, we also say  $Z_T^{S_1} = \{I_1^{S_1}, \dots, I_T^{S_1}\}$  and  $Z_T^{S_2} = \{I_1^{S_2}, \dots, I_T^{S_2}\}$  are **Arm-Coupled**.*

Our goal is to compare  $(\text{LSI}, S^{(-i)})$  and any other strategy  $S = (S^{(i)}, S^{(-i)})$  for arm  $i$ , using **Arm Coupling**. In the remainder of this proof we will always fix all other arms' manipulation strategy  $S^{(-i)}$ . Thus for convenience we simply omit  $S^{(-i)}$  in the superscript and use  $Z_t^{\text{LSI}}$  and  $Z_t^{S^{(i)}}$  to denote the two stochastic sequences of our interests. Let  $Z_{t:t'}^{\text{LSI}}$  denote the stochastic process from time  $t$  to time  $t'$  under  $(\text{LSI}, S^{(-i)})$  manipulation, and similarly for  $Z_{t:t'}^{S^{(i)}}$ . Similar notations and simplifications are used for  $n_i$ . We first show LSI is the dominant strategy for the arm when principal runs UCB algorithm, given any history  $h_{t-1}$ . Hence LSI is a dominant-strategy SPE.

The following lemma shows an interesting property about the two arm sequences  $Z_t^{\text{LSI}}$  and any  $Z_t^{S^{(i)}}$  pulled under these two different investment strategies. That is, under **Arm Coupling**, all the arms — except for the special arm  $i$  — will be pulled according to the same order after time  $t$ , given any history  $h_{t-1}$ .

**Lemma B.2.** *Suppose  $t \geq K$  and the principal runs UCB algorithm. Let  $Z_{t:t'}^{\text{LSI}}(-i)$  [resp.  $Z_{t:t'}^{S^{(i)}}(-i)$ ] denote the subsequence of  $Z_{t:t'}^{\text{LSI}}$  [resp.  $Z_{t:t'}^{S^{(i)}}$ ] after deleting all  $i$ 's in the sequence. Then given any history  $h_{t-1}$  and time  $t$ , under **Arm Coupling**, either  $Z_{t:t'}^{\text{LSI}}(-i)$  is a subsequence of  $Z_{t:t'}^{S^{(i)}}(-i)$  or vice versa.*

*Proof.* We prove by induction on  $t'$ . When  $t' = t$ , if  $I_t^{(\text{LSI}, S^{(-i)})}$  or  $I_t^S$  is  $i$ , the conclusion holds trivially. If  $I_t^S = k \neq i$ , then  $k$  is the largest UCB term. Since the history  $h_{t-1}$  is fixed, UCB terms of each arm must be the same, thus, if  $I_t^S = k$ , then  $I_t^{\text{LSI}} = k$ , as desired.

Now, assume the lemma holds for some  $t' (> t)$ , and we now consider the case  $t' + 1$ . This follows a case analysis.

If  $n_i^{\text{LSI}}(t : t') = n_i^{S^{(i)}}(t : t')$ , then we know that  $Z_{t:t'}^{\text{LSI}}(-i)$  and  $Z_{t:t'}^{S^{(i)}}(-i)$  have the same length. Since one of them is a subsequence of the other by induction hypothesis, this implies that they are the same sequence. If one of  $I_{t'+1}^{\text{LSI}}, I_{t'+1}^{S^{(i)}}$  equals  $i$ , say, e.g.,  $I_{t'+1}^{\text{LSI}} = i$ , then  $Z_{t:t'+1}^{\text{LSI}}(-i) = Z_{t:t'+1}^{\text{LSI}}(-i) = Z_{t:t'+1}^{S^{(i)}}(-i)$  which is a subsequence of  $Z_{t:t'+1}^{S^{(i)}}(-i)$ , as desired. If both  $I_{t'+1}^{\text{LSI}}, I_{t'+1}^{S^{(i)}}$  are not equal to  $i$ , then we claim that they must be the same arm. This is because they are the arm with the highest UCB index after round  $t$ . Since  $Z_{t:t'}^{\text{LSI}}(-i)$  and  $Z_{t:t'}^{S^{(i)}}(-i)$  are the same sequence of arms, each arm is pulled by exactly the same time in both stochastic processes from 0 to  $t'$ , given the fixed history  $h_{t-1}$ . Moreover, due to **Arm Coupling**, their rewards are also the same. Given the fixed strategies of the other arms  $S^{(-i)}$ , their manipulations will also be the same. Therefore, the arm with the highest *modified UCB terms* must also be the same. Therefore, we have  $Z_{t:t'+1}^{\text{LSI}}(-i) = Z_{t:t'+1}^{S^{(i)}}(-i)$ , as desired.

If  $n_i^{\text{LSI}}(t : t') > n_i^{S^{(i)}}(t : t')$ , then we know that  $Z_{t:t'}^{\text{LSI}}(-i)$  is a strict subsequence of  $Z_{t:t'}^{S^{(i)}}(-i)$ . Let  $l = |Z_{t:t'}^{\text{LSI}}(-i)|$  denote the length of  $Z_{t:t'}^{\text{LSI}}(-i)$ , and  $\tilde{k}$  denote the  $(l + 1)$ th element in  $Z_{t:t'}^{S^{(i)}}(-i)$ . We claim that  $I_{t'+1}^{\text{LSI}}$  must be either  $i$  or  $\tilde{k}$ , which implies  $Z_{t:t'+1}^{\text{LSI}}(-i)$  is a subsequence of  $Z_{t:t'+1}^{S^{(i)}}(-i)$  as desired. In particular, if  $I_{t'+1}^{\text{LSI}} \neq i$ , then the fact that  $\tilde{k}$  is the  $(l + 1)$ th element in  $Z_{t:t'}^{S^{(i)}}(-i)$  implies that  $\tilde{k}$  has the highest *modified UCB term* among all arms in  $[K] \setminus \{i\}$  when these arms are pulled according to sequence  $Z_t^{S^{(i)}}$ . Following the same argument above and **Arm Coupling**, we know that  $I_{t'+1}^{\text{LSI}}$ , the arm with the highest *modified UCB term*, must equal  $\tilde{k}$  if it does not equal  $i$ .

The case of  $n_i^{\text{LSI}}(t : t') < n_i^{S^{(i)}}(t : t')$  can be argued similarly. This concludes the proof of the lemma.  $\square$

The following lemma shows that under **Arm Coupling**, the number of times that arm  $i$  is pulled up to time  $T$  under strategy LSI is always at least that under any other investment strategy  $S^{(i)}$ .

**Lemma B.3.** *When the principal runs UCB algorithm, under **Arm Coupling**, given any history  $h_{t-1}$  and time  $t$ , we have  $n_i^{\text{LSI}}(t : T) \geq n_i^{S^{(i)}}(t : T)$  with probability 1 for any investment strategy  $S$  and  $T \geq t \geq K$ .*

*Proof.* We still prove through induction. Given any fixed  $t \geq K$  and history  $h_{t-1}$ , for  $T = t$ , it holds trivially since if  $I_t^{S^{(i)}} = i$  then  $I_t^{\text{LSI}}$  must be  $i$ . We assume this lemma is true for  $t' = T - 1 > t$ . For  $t' = T$ , we consider the following two cases.

- (1) If  $n_i^{\text{LSI}}(t : T - 1) > n_i^{S^{(i)}}(t : T - 1)$ , then  $n_i^{\text{LSI}}(t : T) \geq n_i^{\text{LSI}}(t : T - 1) \geq n_i^{S^{(i)}}(t : T - 1) + 1 \geq n_i^{S^{(i)}}(t : T)$ , as desired.

(2) If  $n_i^{\text{LSI}}(t : T - 1) = n_i^S(t : T - 1)$ , then Lemma B.2 implies that  $Z_{t:T-1}^{\text{LSI}}$  and  $Z_{t:T-1}^S$  are the same sequence. Therefore, the UCB term for each arm  $k \in [K]$  (excluding arm  $i$ ) for LSI and  $S^{(i)}$  are the same at time  $T$ . For arm  $i$ , we have

$$\begin{aligned} \widehat{\text{UCB}}_i^{(\text{LSI}, S^{(-i)})}(T) &= \text{UCB}_i^{(\text{LSI}, S^{(-i)})}(T) + \frac{B_i}{n_i^{(\text{LSI}, S^{(-i)})}(T-1)} = \text{UCB}_i^S(T) + \frac{B_i}{n_i^S(T-1)} \\ &\geq \text{UCB}_i^S(T) + \frac{\beta_{T-1}^{(i)}}{n_i^S(T-1)} = \widehat{\text{UCB}}_i^S(T), \end{aligned}$$

This implies that if  $I_T^S = i$ , then we must also have  $I_T^{(\text{LSI}, S^{(-i)})} = i$ . Then  $n_i^{(\text{LSI}, S^{(-i)})}(T) \geq n_i^S(T)$  still holds.

To sum up,  $n_i^{(\text{LSI}, S^{(-i)})}(t : T) \geq n_i^S(t : T)$  holds with probability 1, concluding the proof.  $\square$

### B.3. Proof of Theorem 3.4

We show the lower bound of the regret by deriving the upper bound of the expected number of times that arm  $i^*$  being pulled, which is summarized in Lemma B.4. Given Lemma B.4 and Eq. (3), it is straightforward to conclude Theorem 3.4 for UCB principal.

**Lemma B.4.** *Suppose each strategic arm  $i (i \neq i^*)$  uses LSI and  $\underline{\Delta} = \min_{i \neq i^*} \Delta_i$ , the expected number of times that optimal arm  $i^*$  being pulled up to time  $T$  is bounded by,*

$$\mathbb{E}[n_{i^*}(T)] \leq T - \sum_{i \neq i^*} \frac{B_i}{2\Delta_i} + \mathcal{O}\left(\frac{\ln T}{\underline{\Delta}^2}\right)$$

*Proof.* Let  $\underline{\Delta} = \min_{i \neq i^*} \Delta_i$ ,  $C(T) = \frac{36\sigma^2 \ln T}{\underline{\Delta}^2}$ ,  $D_i = \frac{B_i}{2\Delta_i}$ . First, by Fact A.2, we have for any  $\ell \geq C(T)$ ,  $s \geq 1$  and any  $i$ ,

$$\begin{aligned} \mathbb{P}\left(\mu_i - \widehat{\mu}_i(t-1) \geq 3\sigma \sqrt{\frac{\ln T}{n_i(t-1)}} \mid n_i(t-1) = s\right) &\leq \frac{1}{T^{9/2}} \\ \mathbb{P}\left(\widehat{\mu}_{i^*}(t-1) - \mu_{i^*} \geq \frac{\Delta_i}{2} \mid n_{i^*}(t-1) = \ell\right) &\leq \exp\left(-\frac{\ell \Delta_i^2}{8\sigma^2}\right) \leq \exp\left(-\frac{C(T) \Delta_i^2}{8\sigma^2}\right) \leq \frac{1}{T^{9/2}} \end{aligned} \quad (10)$$

First, we decompose  $\mathbb{E}[n_{i^*}(T)]$  as follows,

$$\begin{aligned} \mathbb{E}[n_{i^*}(T)] &\leq 1 + \mathbb{E}\left[\sum_{t=K+1}^T \mathbb{I}\{I_t = i^*, n_{i^*}(t-1) \leq C(T)\}\right] + \mathbb{E}\left[\sum_{t=K+1}^T \mathbb{I}\{I_t = i^*, n_{i^*}(t-1) \geq C(T)\}\right] \\ &\leq 1 + \mathbb{E}\left[\sum_{t=K+1}^T \mathbb{I}\{I_t = i^*, n_{i^*}(t-1) \leq C(T)\}\right] \\ &\quad + \mathbb{E}\left[\sum_{t=K+1}^T \mathbb{I}\{I_t = i^*, n_{i^*}(t-1) \geq C(T), \forall i \neq i^*, n_i(t-1) \geq D_i\}\right] \\ &\quad + \mathbb{E}\left[\sum_{t=K+1}^T \mathbb{I}\{I_t = i^*, n_{i^*}(t-1) \geq C(T), \exists i \neq i^*, n_i(t-1) \leq D_i\}\right] \end{aligned} \quad (11)$$

For the first term in the above decomposition, it can be trivially bounded by  $C(T)$ . For the second term, since  $n_{i^*}(t) \leq T - \sum_{i \neq i^*} n_i(t)$ ,  $\forall t$ , we have

$$\begin{aligned} &\mathbb{E}\left[\sum_{t=K+1}^T \mathbb{I}\{I_t = i^*, n_{i^*}(t-1) \geq C(T), \forall i \neq i^*, n_i(t-1) \geq D_i\}\right] \\ &\leq \mathbb{E}\left[\sum_{t=K+1}^T \mathbb{I}\{I_t = i^*, n_{i^*}(t-1) \leq T - \sum_{i \neq i^*} D_i\}\right] \leq T - \sum_{i \neq i^*} \frac{B_i}{2\Delta_i} \end{aligned}$$

What remains is to bound the third term in Equations (11). By union bound, we have

$$\begin{aligned} & \mathbb{E} \left[ \sum_{t=K+1}^T \mathbb{I}(I_t = i^*, n_{i^*}(t-1) \geq C(T), \exists i \neq i^*, n_i(t-1) \leq D_i) \right] \\ &= \sum_{i \neq i^*} \sum_{t=K+1}^T \mathbb{P}(I_t = i^*, n_{i^*}(t-1) \geq C(T), n_i(t-1) \leq D_i) \end{aligned}$$

Note  $I_t = i^*$  implies  $\text{UCB}_{i^*}(t) \geq \widehat{\text{UCB}}_i(t)$ , combining the facts that  $3\sigma\sqrt{\frac{\ln T}{n_{i^*}(t-1)}} \leq \underline{\Delta}/2$  and  $\frac{B_i}{n_i(t-1)} \geq 2\Delta_i$  and standard union bound, we have

$$\begin{aligned} & \mathbb{P}(I_t = i^*, n_{i^*}(t-1) \geq C(T), n_i(t-1) \leq D_i) \\ & \leq \sum_{s=1}^{D_i \wedge t-1} \sum_{\ell \geq C(T)}^{t-1} \mathbb{P} \left( \widehat{\mu}_{i^*}(t-1) + 3\sigma\sqrt{\frac{\ln T}{n_{i^*}(t-1)}} \geq \text{UCB}_i(t) + \frac{B_i}{n_i(t-1)} \mid n_{i^*}(t-1) = \ell, n_i(t-1) = s \right) \\ & \leq \sum_{s=1}^{D_i \wedge t-1} \sum_{\ell \geq C(T)}^{t-1} \mathbb{P} \left( \widehat{\mu}_{i^*}(t-1) + \frac{\Delta_i}{2} \geq \widehat{\mu}_i(t-1) + 3\sigma\sqrt{\frac{\ln T}{n_i(t-1)}} + 2\Delta_i, \mid n_{i^*}(t-1) = \ell, n_i(t-1) = s \right) \quad (12) \\ & \leq \sum_{s=1}^{D_i \wedge t-1} \sum_{\ell \geq C(T)}^{t-1} \mathbb{P} \left( \widehat{\mu}_{i^*}(t-1) - \mu_{i^*} \geq \frac{\Delta_i}{2} \mid n_{i^*}(t-1) = \ell \right) + \mathbb{P} \left( \mu_i - \widehat{\mu}_i(t-1) \geq 3\sigma\sqrt{\frac{\ln T}{n_i(t-1)}} \mid n_i(t-1) = s \right) \end{aligned}$$

The last inequality is based on union bound, if both  $\widehat{\mu}_{i^*}(t-1) - \mu_{i^*} < \underline{\Delta}/2$  and  $\mu_i - \widehat{\mu}_i(t-1) < 3\sigma\sqrt{\frac{\ln T}{n_i(t-1)}}$  hold when  $n_{i^*}(t-1) = \ell, n_i(t-1) = s$ , then

$$\begin{aligned} \widehat{\mu}_{i^*}(t-1) + \frac{\Delta_i}{2} &< \mu_{i^*} + \frac{\Delta_i}{2} + \frac{\Delta_i}{2} \leq \mu_i + \Delta_i + \Delta_i \\ &< \widehat{\mu}_i(t-1) + 3\sigma\sqrt{\frac{\ln T}{n_i(t-1)}} + 2\Delta_i \end{aligned}$$

Given Equation (10), we have

$$\mathbb{P}(I_t = i^*, n_{i^*}(t-1) \geq C(T), n_i(t-1) \leq D_i) \leq \sum_{s=1}^{t-1} \sum_{\ell=1}^{t-1} \frac{2}{T^{9/2}} \leq \frac{2}{T^2}$$

Combining Equation (11), we get

$$\begin{aligned} \mathbb{E}[n_{i^*}(T)] &\leq 1 + C(T) + T - \sum_{i \neq i^*} \frac{B_i}{2\Delta_i} + \sum_{i \neq i^*} \sum_{t=K+1}^T \frac{2}{T^2} \\ &= T + \frac{36\sigma^2 \ln T}{\underline{\Delta}^2} - \sum_{i \neq i^*} \frac{B_i}{2\Delta_i} + 1 + \frac{2(K-1)}{T} \end{aligned}$$

□

Combining Lemma B.4 and Eq/ 3, we complete the proof for Theorem 3.4.

#### B.4. Proof of Theorem 3.5

To prove Theorem 3.5, we first show the following Lemma.

**Lemma B.5.** *Suppose all the strategic arms use LSIBR, and let time step  $n$  be the last time that a strategic arm spend budget for some  $n \leq T$ . Then for the three algorithms we consider (UCB,  $\varepsilon$ -Greedy and TS), the expected number of plays of the optimal arm  $i^*$  from time  $n+1$  to  $T$  is bounded by,*

$$\mathbb{E} \left[ \sum_{t=n+1}^T \mathbb{I}\{I_t = i^*\} \right] \leq \mathbb{E}[n_{i^*}^{\text{LSI}}(T)] = T - \sum_{i \neq i^*} \frac{B_i}{2\Delta_i} + \mathcal{O}\left(\frac{\ln T}{\underline{\Delta}^2}\right).$$

*Proof.* The proof follows a simple reduction to the setting with arms using LSI. By using LSIBR, any strategic arm  $i$  has no budget to manipulate after (includes) time step  $n + 1$ , which is analogous to the case that arm  $i$  has no budget to manipulate after time  $K + 1$  using LSI in unbounded reward setting. Then after time  $n + 1$ , the  $\tilde{\mu}_i(t - 1) = \hat{\mu}_i(t - 1) + \frac{B_i}{n_i(t-1)}$ ,  $\forall \in [K]$ , which shares the same formula with it in LSI setting. Finally, we notice that the proofs of the upper bounds of  $\mathbb{E} \left[ \sum_{t=K+1}^T \mathbb{I}\{I_t = i^*\} \right]$  in LSI settings (Lemma B.4, C.6 and Theorem C.7) don't depend on the starting time step in the summand. Therefore, the proofs in these previous results can be directly applied here.  $\square$

Next, we prove Theorem 3.5 using the above Lemma.

**Proof of Theorem 3.5.** Let  $n$  be the last time step that any arm can spend the budget. First we show the upper bound of  $\mathbb{E} [n_{i^*}^{\text{LSIBR}}(T)]$ . Note, from time 1 to  $n - 1$ , any strategic arm  $i$  always promote its reward to 1, which makes arm  $i$  the "optimal arm" from time 1 to  $n$  (the arm selection at time  $n$  only depends on previous feedback). Then following the standard analysis in stochastic MAB algorithms (UCB,  $\varepsilon$ -Greedy and Thompson Sampling),  $\mathbb{E} [n_{i^*}^{\text{LSIBR}}(n)] \leq O\left(\frac{\ln n}{(1 - \mu_{i^*})^2}\right)$ . Thus,  $\mathbb{E} [n_{i^*}^{\text{LSIBR}}(T)]$  can be bounded by,

$$\mathbb{E} [n_{i^*}^{\text{LSIBR}}(T)] \leq \mathbb{E} [n_{i^*}^{\text{LSI}}(T)] + O\left(\frac{\ln n}{(1 - \mu_{i^*})^2}\right).$$

Consequently, we can show the lower bound of regret when all strategic arms use LSIBR, as follows

$$\mathbb{E} [R^{\text{LSIBR}}(T)] \geq \mathbb{E} [R^{\text{LSI}}(T)] - O\left(\frac{\Delta \ln T}{(1 - \mu_{i^*})^2}\right).$$

$\square$

## C. Omitted Proofs in Section 4

### C.1. Proof of Theorem 4.1

To prove this theorem, we instead prove the following Lemma C.1 to bound  $\mathbb{E}[n_i(T)]$  for each arm  $i \neq i^*$ . Given this Lemma, it is then easy to show Theorem 4.1.

**Lemma C.1.** *Suppose the principal runs the  $\varepsilon$ -Greedy algorithm with  $\varepsilon_t = \min\{1, \frac{cK}{t}\}$  when  $t > K$ , where the constant  $c = \max\{20, \frac{36\sigma^2}{\Delta^2}\}$ . Then for any strategic manipulation strategy  $S$ , the expected number of times of arm  $i$  being pulled up to time  $T$  can be bounded by*

$$\mathbb{E} [n_i(T)] \leq \frac{3B_i}{\Delta_i} + O\left(\frac{\ln T}{\Delta_i^2}\right).$$

*Proof.* Let  $C_i = \frac{3B_i}{\Delta_i}$ ,  $x_t = \frac{1}{2K} \sum_{s=K+1}^t \epsilon_s$  and for  $t \geq \lfloor cK \rfloor + 1$ , Given Fact A.3, we have

$$x_t \geq \sum_{s=K+1}^{\lfloor cK \rfloor} \frac{\epsilon_s}{2K} + \sum_{t=\lfloor cK \rfloor+1}^t \frac{\epsilon_s}{2K} \geq \lfloor cK \rfloor - K + \frac{c}{2} \sum_{s=\lfloor cK \rfloor+1}^t \frac{1}{s} \geq \lfloor cK \rfloor - K + \frac{c}{2} \ln \frac{t}{\lfloor cK \rfloor + 1} \quad (13)$$

We do the decomposition for  $\mathbb{E}[n_i(T)]$  as follows,

$$\begin{aligned} \mathbb{E} [n_i(T)] &\leq 1 + \mathbb{E} \left[ \sum_{t=K+1}^T \mathbb{I}\{I_t = i, n_i(t-1) \leq C_i\} \right] + \mathbb{E} \left[ \sum_{t=K+1}^T \mathbb{I}\{I_t = i, n_i(t-1) \geq C_i\} \right] \\ &\leq 1 + C_i + \sum_{t=K+1}^T \frac{\epsilon_t}{K} + \mathbb{E} \left[ \sum_{t=K+1}^T (1 - \epsilon_t) \cdot \mathbb{I}\{\tilde{\mu}_i(t-1) \geq \hat{\mu}_{i^*,t-1}, n_i(t-1) \geq C_i\} \right] \\ &\leq 1 + C_i + \sum_{t=K+1}^T \frac{\epsilon_t}{K} + \sum_{t=\lfloor cK \rfloor+1}^T \mathbb{P}\left(\hat{\mu}_i(t-1) + \frac{\beta_{t-1}}{n_i(t-1)} \geq \hat{\mu}_{i^*}(t-1), n_i(t-1) \geq C_i\right) \end{aligned} \quad (14)$$

The last inequality holds because  $\epsilon_t = 1$  when  $t \leq \lfloor cK \rfloor$  and  $1 - \epsilon_t \leq 1, \forall t$ . What remains is to bound the last term above. Since  $n_i(t-1) \geq C_i, \beta_{t-1} \leq B_i, \forall t \leq T$ , this term is always upper bounded by

$$\begin{aligned} \mathbb{P}\left(\widehat{\mu}_i(t-1) + \frac{\beta_{t-1}}{n_i(t-1)} \geq \widehat{\mu}_{i^*}(t-1), n_i(t-1) \geq C_i\right) &\leq \mathbb{P}\left(\widehat{\mu}_i(t-1) + \frac{B_i}{C_i} \geq \widehat{\mu}_{i^*}(t-1)\right) \\ &= \mathbb{P}\left(\widehat{\mu}_i(t-1) + \frac{\Delta_i}{3} \geq \widehat{\mu}_{i^*}(t-1)\right) \end{aligned} \quad (15)$$

By union bound, we have  $\mathbb{P}\left(\widehat{\mu}_i(t-1) + \frac{\Delta_i}{3} \geq \widehat{\mu}_{i^*}(t-1)\right) \leq \mathbb{P}\left(\widehat{\mu}_i(t-1) \geq \mu_i + \frac{\Delta_i}{3}\right) + \mathbb{P}\left(\widehat{\mu}_{i^*}(t-1) \leq \mu_{i^*} - \frac{\Delta_i}{3}\right)$ . Based on Lemma A.5, we have

$$\mathbb{P}\left(\widehat{\mu}_i(t-1) + \frac{\Delta_i}{3} \geq \widehat{\mu}_{i^*}(t-1)\right) \leq 2x_t \cdot e^{-x_t/5} + \frac{18\sigma^2}{\Delta_i^2} e^{-\Delta_i^2 \lfloor x_t \rfloor / 18\sigma^2} \quad (16)$$

We observe the fact that  $x_t \geq \lfloor cK \rfloor - K + \frac{c}{2} \ln \frac{t}{\lfloor cK \rfloor + 1} > 5$ . Given  $xe^{-x/5} \leq ye^{-y/5}, \forall x \geq y \geq 5$  and  $e^{-x} \leq e^{-y}, \forall x \geq y$ , we have

$$\begin{aligned} x_t e^{-x_t/5} &\leq \left(\lfloor cK \rfloor - K + \frac{c}{2} \ln \frac{t}{\lfloor cK \rfloor + 1}\right) e^{-\frac{c}{10} \ln \frac{t}{\lfloor cK \rfloor + 1}} = \left(\lfloor cK \rfloor - K + \frac{c}{2} \ln \frac{t}{\lfloor cK \rfloor + 1}\right) \cdot \left(\frac{\lfloor cK \rfloor + 1}{t}\right)^{c/10} \\ &\leq \frac{\sigma^2}{\Delta_i^2} e^{-\Delta_i^2 \lfloor x_{t-1} \rfloor / 18\sigma^2} \leq \frac{\sigma^2}{\Delta_i^2} e^{-\Delta_i^2 c \ln \frac{t}{\lfloor cK \rfloor + 1} / 36\sigma^2} = \frac{\sigma^2}{\Delta_i^2} \left(\frac{\lfloor cK \rfloor + 1}{t}\right)^{c\Delta_i^2 / 36\sigma^2} \end{aligned}$$

Combining the above inequalities and Fact A.3, we can bound

$$\begin{aligned} &\sum_{t=\lfloor cK \rfloor + 1}^T 2x_t \cdot e^{-x_t/5} + \frac{18\sigma^2}{\Delta_i^2} e^{-\Delta_i^2 \lfloor x_t \rfloor / 18\sigma^2} \\ &\leq \sum_{t=\lfloor cK \rfloor + 1}^T \left(2\lfloor cK \rfloor - 2K + c \ln \left(\frac{t}{\lfloor cK \rfloor + 1}\right)\right) \cdot \left(\frac{\lfloor cK \rfloor + 1}{t}\right)^2 + \frac{18\sigma^2}{\Delta_i^2} \frac{\lfloor cK \rfloor + 1}{t} \\ &\leq (\lfloor cK \rfloor - K) \cdot \frac{2(\lfloor cK \rfloor + 1)^2 \pi^2}{3} + \left(c + \frac{18\sigma^2}{\Delta_i^2}\right) \sum_{t=\lfloor cK \rfloor + 1}^T \frac{\lfloor cK \rfloor + 1}{t} \\ &\leq (\lfloor cK \rfloor - K) \cdot \frac{2(\lfloor cK \rfloor + 1)^2 \pi^2}{3} + (\lfloor cK \rfloor + 1) \left(c + \frac{18\sigma^2}{\Delta_i^2}\right) \ln \frac{T}{\lfloor cK \rfloor} \end{aligned} \quad (17)$$

The first inequality in the above holds because  $c \geq \max\{20, \frac{36\sigma^2}{\Delta_i^2}\}$ , and the second inequality is based on the fact that  $\ln x < x, \forall x > 1$  and  $\sum_{t=1}^T \frac{1}{t^2} \leq \frac{\pi^2}{3}$ . The last inequality is the implication of Fact A.3. Moreover, utilizing Fact A.3, we bound  $\sum_{t=K+1}^T \frac{\epsilon_t}{K}$  in the following way,

$$\sum_{t=K+1}^T \frac{\epsilon_t}{K} = \sum_{t=K+1}^{\lfloor cK \rfloor} \frac{1}{K} + \sum_{t=\lfloor cK \rfloor + 1}^T \frac{\epsilon_t}{K} \leq \frac{\lfloor cK \rfloor - K}{K} + c \ln \frac{T}{\lfloor cK \rfloor}, \quad (18)$$

Combining Equations (14), (15), (16) and (18), we complete the proof.  $\square$

## C.2. Proof of Lemma 4.3

We bound the terms in the decomposition of  $\mathbb{E}[n_i(T)]$  in Eq. (6) using Lemma C.2 – Lemma C.5.

**Lemma C.2** (Lemma 2.16 in (Agrawal & Goyal, 2017)). *Let  $x_i = \mu_i + \frac{\Delta_i}{3}$  and  $y_i = \mu_{i^*} - \frac{\Delta_i}{3}$ ,*

$$\mathbb{E}\left[\sum_{t=K+1}^T \mathbb{I}\{I_t = i, E_i^\mu(t), \overline{\mathbb{E}}_i^\theta(t)\}\right] \leq \frac{18 \ln T}{\Delta_i^2} + 1$$

**Lemma C.3** (Eq. (4) in (Agrawal & Goyal, 2017)).  $\sum_{t=K+1}^T \mathbb{P}(I_t = i, E_i^\mu(t), \mathbb{E}_i^\theta(t)) \leq \sum_{s=K+1}^{T-1} \mathbb{E}\left[\frac{1}{p_{i, \tau_{i^*, s+1}}} - 1\right]$

**Lemma C.4** (Extension of Lemma 2.13 in (Agrawal & Goyal, 2017)). Let  $y_i = \mu_{i^*} - \frac{\Delta_i}{3}$ ,

$$\mathbb{E} \left[ \frac{1}{p_{i, \tau_{i^*, s}+1}} - 1 \right] \leq \begin{cases} e^{11/4\sigma^2} + \frac{\pi^2}{3} \\ \frac{4}{T\Delta_i^2} \end{cases} \quad \text{if } s \geq \frac{\forall s}{\Delta_i^2} \cdot \max\{1, \sigma^2\}$$

*Proof.* This lemma extends Lemma 2.13 in (Agrawal & Goyal, 2017) to our setting, and we mainly emphasize the required changes to the proof. Using the same notation as in (Agrawal & Goyal, 2017), let  $\Theta_j$  denote the Gaussian random variable follows  $\mathcal{N}(\widehat{\mu}_{i^*}(\tau_j + 1), \frac{1}{j})$ , given  $\mathcal{F}_{\tau_j}$ . Let  $G_j$  be the geometric random variable denoting the number of consecutive independent trials until a sample of  $\Theta_j$  becomes greater than  $y_i$ . Let  $\gamma \geq 1$  be an integer and  $z = 2\sigma\sqrt{\ln \gamma}$ . Then we have  $\mathbb{E} \left[ \frac{1}{p_{i, \tau_{j+1}}} - 1 \right] = \mathbb{E}[G_j]$ . Following the same argument proposed in (Agrawal & Goyal, 2017), we have for any  $\gamma > e^{11/4\sigma^2}$ ,

$$\mathbb{P}(G_j < \gamma) \geq \left(1 - \frac{1}{\gamma^2}\right) \mathbb{P}\left(\widehat{\mu}_{i^*} + \frac{z}{\sqrt{j}} \geq y_i\right)$$

For  $n_{i^*}(t-1) = j$ ,  $\mathcal{F}_{\tau_j}$ , we have

$$\begin{aligned} \mathbb{P}\left(\widehat{\mu}_{i^*}(\tau_j + 1) + \frac{z}{\sqrt{j}} \geq y_i\right) &\geq \mathbb{P}\left(\widehat{\mu}_{i^*}(\tau_j + 1) + \frac{z}{\sqrt{j}} \geq \mu_{i^*}\right) \\ &\geq 1 - e^{-\frac{z^2}{2\sigma^2}} \\ &= 1 - e^{-4\sigma^2 \ln \gamma / 2\sigma^2} = 1 - \left(\frac{1}{\gamma}\right)^2 \end{aligned}$$

Then  $\mathbb{P}(G_j < \gamma) \geq 1 - \frac{1}{\gamma^2} - \frac{1}{\gamma^2} = 1 - \frac{2}{\gamma^2}$ . Therefore,

$$\mathbb{E}[G_j] = \sum_{\gamma=0}^T \mathbb{P}(G_j \geq \gamma) \leq e^{11/4\sigma^2} + \sum_{\gamma \geq 1} \frac{2}{\gamma^2} \leq e^{11/4\sigma^2} + \frac{\pi^2}{3}$$

By the proof of Lemma 2.13 in (Agrawal & Goyal, 2017), we have for any  $D_i(T) \geq 0$ ,

$$\mathbb{E} \left[ \frac{1}{p_{i, \tau_{j+1}}} - 1 \right] \leq \frac{1}{\left(1 - \frac{1}{2}e^{-D_i(T)\Delta_i^2/72}\right) \left(1 - e^{-D_i(T)\Delta_i^2/72\sigma^2}\right)}$$

Since  $D_i(T) = \frac{72 \ln(T\Delta_i^2) \cdot \max\{1, \sigma^2\}}{\Delta_i^2}$ , we have both  $1 - \frac{1}{2}e^{-D_i(T)\Delta_i^2/72}$  and  $1 - e^{-D_i(T)\Delta_i^2/72\sigma^2}$  are larger than or equal to  $1 - \frac{1}{T\Delta_i^2}$ . Thus,  $\mathbb{E} \left[ \frac{1}{p_{i, \tau_{j+1}}} - 1 \right]$  can be bounded by  $\frac{4}{T\Delta_i^2}$  when  $j \geq D_i(T)$ .  $\square$

**Lemma C.5.**

$$\mathbb{E} \left[ \sum_{t=K+1}^T \mathbb{I}\{I_t = i, \overline{E_i^\mu(t)}\} \right] \leq \max \left\{ \frac{6B_i}{\Delta_i}, \frac{144\sigma^2 \ln T}{\Delta_i^2} \right\} + 1 \quad (19)$$

*Proof.* Let  $C_i(T) = \max \left\{ \frac{6B_i}{\Delta_i}, \frac{144\sigma^2 \ln T}{\Delta_i^2} \right\}$ . We first decompose the left hand side in Equation (19) as below,

$$\begin{aligned} \mathbb{E} \left[ \sum_{t=K+1}^T \mathbb{I}\{I_t = i, \overline{E_i^\mu(t)}\} \right] &\leq \mathbb{E} \left[ \sum_{t=K+1}^T \mathbb{I}\{I_t = i, \overline{E_i^\mu(t)}, n_i(t-1) \leq C_i(T)\} \right] \\ &\quad + \mathbb{E} \left[ \sum_{t=K+1}^T \mathbb{I}\{I_t = i, \overline{E_i^\mu(t)}, n_i(t-1) \geq C_i(T)\} \right] \end{aligned} \quad (20)$$



The first term in the above decomposition is trivially bounded by  $c_i(T)$ . What remains is to bound second term

$$\begin{aligned}
 & \mathbb{E} \left[ \sum_{t=K+1}^T \mathbb{I}\{I_t = i, \overline{E}_{i,t}^\mu, n_i(t-1) \geq c_i(T)\} \right] \\
 & \leq \sum_{t=K+1}^T \mathbb{P} \left( \overline{E}_{i,t}^\mu, n_i(t-1) \geq C_i(T) \right) \\
 & \leq \sum_{t=K+1}^T \mathbb{P} \left( \widehat{\mu}_{i,t-1} + \frac{\beta_{t-1}}{n_i(t-1)} \geq x_i \mid n_i(t-1) \geq C_i(T) \right) \\
 & \leq \sum_{t=K+1}^T \mathbb{P} \left( \widehat{\mu}_{i,t-1} + \frac{\beta_{t-1}}{n_i(t-1)} \geq x_i \mid n_i(t-1) \geq C_i(T) \right)
 \end{aligned}$$

By union bound, we have

$$\begin{aligned}
 & \mathbb{P} \left( \widehat{\mu}_{i,t-1} + \frac{\beta_{t-1}}{n_i(t-1)} \geq x_i \mid n_i(t-1) \geq C_i(T) \right) \\
 & \leq \sum_{s=c_i(T)}^{t-1} \mathbb{P} \left( \widehat{\mu}_{i,t-1} + \frac{B_i}{n_i(t-1)} \geq x_i \mid n_i(t-1) = s \right) \\
 & \leq \sum_{s=c_i(T)}^{t-1} e^{-\frac{s \cdot (x_i - \mu_i - \frac{B_i}{s})^2}{2\sigma^2}} \leq \sum_{s=1}^{t-1} \frac{1}{T^2}
 \end{aligned}$$

The last inequality above uses Fact (A.2) and the fact  $s \geq c_i(T) \geq \frac{6B_i}{\Delta_i}$  and  $s \geq \frac{144\sigma^2 \ln T}{\Delta_i^2}$ . Then the second term of the right hand side in Equations 20 can be bounded by  $\sum_{t=K+1}^T \sum_{s=1}^{t-1} \frac{1}{T^2} \leq 1$ .  $\square$

### C.3. Proof of Proposition 4.4

We complete the proofs for  $\epsilon$ -Greedy principal and Thompson Sampling separately. Similar to UCB principal, we derive the upper bound of  $\mathbb{E}[n_{i^*}(T)]$  when all strategic arms use LSI manipulation strategy, shown in Lemma C.6 (for  $\epsilon$ -Greedy principal) and Theorem C.7 (for Thompson Sampling). Then Proposition 4.4 is straightforward.

**$\epsilon$ -Greedy principal.**

**Lemma C.6.**  $\forall t > K$ , let  $\epsilon_t = \min\{1, \frac{cK}{t}\}$ , where a constant  $c = \max\left\{20, \frac{16\sigma^2}{\Delta_k^2}, \forall k \in [K]\right\}$ ,  $B_i$  be the total budget for strategic arm. The expected number of plays of arm  $i^*$  up to time  $T$ , if all strategic arms use LSI, is bounded by

$$\mathbb{E}[n_{i^*}(T)] \leq T - \sum_{i \neq i^*} \frac{B_i}{2\Delta_i} + \mathcal{O}\left(\frac{\ln T}{\underline{\Delta}^2}\right)$$

*Proof.* Let  $C_i = \frac{B_i}{2\Delta_i}$ ,  $x_t = \frac{1}{2K} \sum_{s=K+1}^t \epsilon_s$  and for  $t \geq [cK] + 1$ , by Equation (13)  $x_t \geq [cK] - K + \frac{c}{2} \ln \frac{t}{[cK]+1}$ .

We first bound the probability of  $\mathbb{P}\left(\widehat{\mu}_{i^*}(t-1) \geq \widetilde{\mu}_i(t-1) \mid n_i(t-1) \leq C_i\right)$  for  $t \geq K+1$ ,

$$\begin{aligned}
 & \mathbb{P}\left(\widehat{\mu}_{i^*}(t-1) \geq \widetilde{\mu}_i(t-1), n_i(t-1) \leq C_i\right) \\
 &= \mathbb{P}\left(\widehat{\mu}_{i^*}(t-1) \geq \widehat{\mu}_i(t-1) + \frac{B_i}{n_i(t-1)}, n_i(t-1) \leq C_i\right) \\
 &\leq \mathbb{P}\left(\widehat{\mu}_{i^*}(t-1) \geq \widehat{\mu}_i(t-1) + 2\Delta_i\right) \\
 &\leq \mathbb{P}\left(\widehat{\mu}_{i^*}(t-1) \geq \mu_{i^*} + \frac{\Delta_i}{2}\right) + \mathbb{P}\left(\widehat{\mu}_i(t-1) \leq \mu_i - \frac{\Delta_i}{2}\right) \\
 &\leq 2x_t \cdot e^{-x_t/5} + \frac{8\sigma^2}{\Delta_i^2} e^{-\Delta_i^2 \lfloor x_t \rfloor / 8\sigma^2} \text{ (By Lemma A.5)}
 \end{aligned} \tag{21}$$

We can decompose the expected number of plays of the optimal arm  $i$ ,  $\mathbb{E}[n_{i^*}, T]$ , as follows,

$$\begin{aligned}
 \mathbb{E}[n_{i^*}(T)] &= 1 + \mathbb{E}\left[\sum_{t=K+1}^T \mathbb{I}\{I_t = i^*, \forall i \neq i^*, n_i(t-1) \geq C_i\}\right] \\
 &\quad + \mathbb{E}\left[\sum_{t=K+1}^T \mathbb{I}\{I_t = i^*, \exists i \neq i^*, n_i(t-1) \leq C_i\}\right]
 \end{aligned} \tag{22}$$

The first term in the above decomposition can be bounded by  $T - \sum_{i \neq i^*} C_i$ . This is because

$$\begin{aligned}
 & \mathbb{E}\left[\sum_{t=K+1}^T \mathbb{I}\{I_t = i^*, \forall i \neq i^*, n_i(t-1) \geq C_i\}\right] \\
 &\leq \mathbb{E}\left[\sum_{t=K+1}^T \mathbb{I}\{I_t = i^*, n_{i^*}(t-1) \leq T - \sum_{i \neq i^*} C_i\}\right] \leq T - \sum_{i \neq i^*} C_i.
 \end{aligned}$$

By union bound, the second term is bounded by  $\sum_{i \neq i^*} \mathbb{E}\left[\sum_{t=K+1}^T \mathbb{I}\{I_t = i^*, n_i(t-1) \leq C_i\}\right]$ . Then, we bound the above summand using Equations (21) and the fact that  $1 - \epsilon_t = 0$  when  $t \leq \lfloor cK \rfloor$ ,

$$\begin{aligned}
 & \mathbb{E}\left[\sum_{t=K+1}^T \mathbb{I}\{I_t = i^*, n_i(t-1) \leq C_i\}\right] \\
 &\leq \sum_{t=K+1}^T \frac{\epsilon_t}{K} + \sum_{t=K+1}^T (1 - \epsilon_t) \cdot \mathbb{P}\left(\widehat{\mu}_{i^*}(t-1) \geq \widetilde{\mu}_i(t-1), n_i(t-1) \leq C_i\right) \\
 &\leq \sum_{t=K+1}^T \frac{\epsilon_t}{K} + \sum_{t=\lfloor cK \rfloor + 1}^T 2x_t \cdot e^{-x_t/5} + \frac{8\sigma^2}{\Delta_i^2} e^{-\Delta_i^2 \lfloor x_t \rfloor / 8\sigma^2}
 \end{aligned} \tag{23}$$

What remains is to bound the last term in the above equations. Following the same arguments and proof procedure in Equations (17), we can bound

$$\begin{aligned}
 & \sum_{t=\lfloor cK \rfloor + 1}^T 2x_t \cdot e^{-x_t/5} + \frac{8\sigma^2}{\Delta_i^2} e^{-\Delta_i^2 \lfloor x_t \rfloor / 8\sigma^2} \\
 &\leq (\lfloor cK \rfloor - K) \cdot \frac{2(\lfloor cK \rfloor + 1)^2 \pi^2}{3} + (\lfloor cK \rfloor + 1) \left(c + \frac{8\sigma^2}{\Delta_i^2}\right) \ln \frac{T}{\lfloor cK \rfloor}
 \end{aligned} \tag{24}$$

By Eq. (18), we have

$$\begin{aligned}\mathbb{E}[n_{i^*}(T)] &\leq T - \sum_{i \neq i^*} \frac{B_i}{2\Delta_i} + \frac{\lfloor cK \rfloor}{K} + c \ln \frac{T}{\lfloor cK \rfloor} \\ &\quad + \sum_{i \neq i^*} \left( (\lfloor cK \rfloor - K) \cdot \frac{2(\lfloor cK \rfloor + 1)^2 \pi^2}{3} + (\lfloor cK \rfloor + 1) \left( c + \frac{8\sigma^2}{\Delta_i^2} \right) \ln \frac{T}{\lfloor cK \rfloor} \right) \\ &\leq T - \sum_{i \neq i^*} \frac{B_i}{2\Delta_i} + \mathcal{O} \left( \frac{\ln T}{\Delta^2} \right)\end{aligned}$$

□

**Thompson Sampling principal.** Here we slightly abuse notations, and use  $E_{i^*}^\mu(t)$  to denote the event that  $\widehat{\mu}_{i^*}(t-1) \leq v_i$  whereas  $E_{i^*}^\theta(t)$  to denote the event that  $\theta_{i^*}(t) \leq w_i$ , where  $\mu_{i^*} < v_i < w_i$ .

**Theorem C.7.**

$$\mathbb{E}[n_{i^*}(T)] \leq T - \sum_{i \neq i^*} \frac{B_i}{2\Delta_i} + \mathcal{O} \left( \frac{\ln T}{\Delta^2} \right)$$

*Proof.* We decompose the expected number of plays of the optimal arm  $i^*$  as follows,

$$\begin{aligned}\mathbb{E}[n_{i^*}(T)] &\leq 1 + \sum_{t=K+1}^T \mathbb{P} \left( I_t = i^*, \overline{E_{i^*}^\mu(t)} \right) + \sum_{t=K+1}^T \mathbb{P} \left( I_t = i^*, \overline{E_{i^*}^\theta(t)}, E_{i^*}^\mu(t) \right) \\ &\quad + \sum_{t=K+1}^T \mathbb{P} \left( I_t = i^*, E_{i^*}^\theta(t), E_{i^*}^\mu(t) \right)\end{aligned}$$

Then we bound each of the above terms. Lemma C.8, C.9 and C.12 show the upper bound of each term and complete the proof. □

**Lemma C.8.** Let  $v_i = \mu_{i^*} + \frac{\Delta_i}{3}$ ,

$$\sum_{t=K+1}^T \mathbb{P} \left( I_t = i^*, \overline{E_{i^*}^\mu(t)} \right) \leq \frac{18\sigma^2}{\Delta_i^2}$$

*Proof.* Following the proof of Lemma 2.11 in (Agrawal & Goyal, 2017), we have

$$\begin{aligned}\sum_{t=K+1}^T \mathbb{P} \left( I_t = i^*, \overline{E_{i^*}^\mu(t)} \right) &\leq \sum_{s=1}^{T-1} \mathbb{P} \left( \overline{E_{i^*}^\mu(\tau_{i^*,s+1})} \right) = \sum_{s=1}^{T-1} \mathbb{P} \left( \widehat{\mu}_{i^*}(\tau_{i^*,s+1}) > v_i \right) \\ &\leq \sum_{s=1}^{T-1} \exp \left( -\frac{s(v_i - \mu_{i^*})^2}{2\sigma^2} \right) \leq \frac{2\sigma^2}{(v_i - \mu_{i^*})^2}\end{aligned}$$

The first inequality holds because each summand on the right hand side in this inequality is a fixed number since the distribution of  $\widehat{\mu}_{i^*}(\tau_{i^*,s+1})$  only depends on  $s$ . The second inequality is based on Fact A.4 and the third inequality goes through because  $\sum_{k=1}^{\infty} e^{-kx} \leq \frac{1}{x}$ ,  $\forall x > 0$ . □

Notice that Lemma C.3 holds *independently with* the identity of the arm. Then the following Lemma can be directly implied.

**Lemma C.9.** Let  $v_i = \mu_{i^*} + \frac{\Delta_i}{3}$  and  $w_i = \mu_{i^*} + \frac{2\Delta_i}{3}$

$$\sum_{t=K+1}^T \mathbb{P} \left( I_t = i^*, \overline{E_{i^*}^\theta(t)}, E_{i^*}^\mu(t) \right) \leq \frac{18 \ln T}{\Delta_i^2} + 1$$

*Proof.* The proof of Lemma 2.16 in (Agrawal & Goyal, 2017) can be directly applied here by regarding arm  $i^*$  as a standard sub-optimal arm  $i$ .  $\square$

What remains is to bound  $\sum_{t=K+1}^T \mathbb{P}(I_t = i^*, E_{i^*}^\theta(t), E_{i^*}^\mu(t))$ . To this end, we show some auxiliary lemmas in the following. Lemma C.10 mimics Lemma 2.8 in (Agrawal & Goyal, 2017), which bridges the probability that arm  $i^*$  will be pulled and the probability that arm  $i$  will be pulled at time  $t$ . Lemma C.11 bounds the term  $\mathbb{E}\left[\frac{1}{q_{i,\tau_{i,s}+1}} - 1\right]$  by a reduction to the case shown in Lemma C.3.

**Lemma C.10.** *For any instantiation  $F_{t-1}$  of  $\mathcal{F}_{t-1}$ , let  $q_{i,t} := \mathbb{P}(\theta_i(t) > w_i | F_{t-1})$ , we have*

$$\mathbb{P}\left(I_t = i^*, E_{i^*}^\theta(t), E_{i^*}^\mu(t) | F_{t-1}\right) \leq \frac{1 - q_{i,t}}{q_{i,t}} \mathbb{P}\left(I_t = i, E_{i^*}^\theta(t), E_{i^*}^\mu(t) | F_{t-1}\right)$$

*Proof.* Since  $E_{i^*}^\mu(t)$  is only determined by the instantiation  $F_{t-1}$  of  $\mathcal{F}_{t-1}$ , we can assume event  $E_{i^*}^\mu(t)$  is true without loss of generality. Then, it is sufficient to show that for any  $F_{t-1}$  we have

$$\mathbb{P}\left(I_t = i^* | E_{i^*}^\theta(t), F_{t-1}\right) \leq \frac{1 - q_{i,t}}{q_{i,t}} \mathbb{P}\left(I_t = i, | E_{i^*}^\theta(t), F_{t-1}\right)$$

Note, given  $E_{i^*}^\theta(t)$ ,  $I_t = i^*$  implies  $\theta_j(t) \leq w_i, \forall j$ , meanwhile,  $\theta_i(t)$  is independent with  $\theta_j(t), j \neq i$ , given  $\mathcal{F}_{t-1} = F_{t-1}$ . Therefore, we have

$$\begin{aligned} \mathbb{P}\left(I_t = i^* | E_{i^*}^\theta(t), F_{t-1}\right) &\leq \mathbb{P}\left(\theta_j(t) \leq w_i, \forall j | E_{i^*}^\theta(t), F_{t-1}\right) \\ &= \mathbb{P}\left(\theta_i(t) \leq w_i | F_{t-1}\right) \cdot \mathbb{P}\left(\theta_j(t) \leq w_i, \forall j \neq i | E_{i^*}^\theta(t), F_{t-1}\right) \end{aligned}$$

On the other side,

$$\begin{aligned} \mathbb{P}\left(I_t = i | E_{i^*}^\theta(t), F_{t-1}\right) &\geq \mathbb{P}\left(\theta_i(t) > w_i \geq \theta_j(t), \forall j \neq i | E_{i^*}^\theta(t), F_{t-1}\right) \\ &= \mathbb{P}\left(\theta_i(t) > w_i | F_{t-1}\right) \cdot \mathbb{P}\left(\theta_j(t) \leq w_i, \forall j \neq i | E_{i^*}^\theta(t), F_{t-1}\right) \end{aligned}$$

Thus, the above two inequalities implies the correctness of the Lemma.  $\square$

**Lemma C.11.** *Let  $w_i = \mu_{i^*} + \frac{2\Delta_i}{3}$ . For any  $s \geq 1$ , given  $n_i(\tau_{i,s}) \leq \frac{B_i}{2\Delta_i}$ , we have*

$$\mathbb{E}\left[\frac{1}{q_{i,\tau_{i,s}+1}} - 1 | n_i(\tau_{i,s}) \leq \frac{B_i}{2\Delta_i}\right] \leq \begin{cases} e^{11/4\sigma^2} + \frac{\pi^2}{3} & \forall s \\ \frac{1}{T\Delta_i} & \text{if } s \geq L_i(T) \end{cases}$$

where  $L_i(T) = \frac{72 \ln(T\Delta_i^2) \cdot \max\{1, \sigma^2\}}{\Delta_i^2}$ .

*Proof.* We prove this Lemma by a reduction to Lemma C.4. First, we observe  $\theta_i(\tau_{i,s} + 1) \sim \mathcal{N}\left(\tilde{\mu}_i(\tau_{i,s}), \frac{1}{n_i(\tau_{i,s})}\right)$ , where  $\tilde{\mu}_i(\tau_{i,s}) = \hat{\mu}_i(\tau_{i,s}) + \frac{B_i}{n_i(\tau_{i,s})}$ . Given  $n_i(\tau_{i,s}) \leq \frac{B_i}{\Delta_i}$ , we have  $\tilde{\mu}_i(\tau_{i,s}) \geq \hat{\mu}_i(\tau_{i,s}) + 2\Delta_i$ . Let  $\zeta_i(\tau_{i,s} + 1)$  denote the random variable of Gaussian distribution  $\mathcal{N}\left(\hat{\mu}_i(\tau_{i,s}), \frac{1}{n_i(\tau_{i,s})}\right)$ . By the fact that a Gaussian random variable  $a \sim \mathcal{N}(m, \sigma^2)$  is stochastically dominated by any  $b \sim \mathcal{N}(m', \sigma^2)$  when  $m < m'$ , we have for any  $F_{t-1}$  of  $\mathcal{F}_{t-1}$

$$\begin{aligned} q_{i,\tau_{i,s}+1} &= \mathbb{P}\left(\theta_i(\tau_{i,s} + 1) > w_i | F_{t-1}\right) \geq \mathbb{P}\left(\zeta_i(\tau_{i,s} + 1) + 2\Delta_i > w_i | F_{t-1}\right) \\ &= \mathbb{P}\left(\zeta_i(\tau_{i,s} + 1) > \mu_i - \frac{\Delta_i}{3} | F_{t-1}\right) := \eta_{i,\tau_{i,s}+1} \end{aligned}$$

Therefore,  $\mathbb{E}\left[\frac{1}{q_{i,\tau_{i,s}+1}} - 1\right] \leq \mathbb{E}\left[\frac{1}{\eta_{i,\tau_{i,s}+1}} - 1\right]$ . Denote  $u_i := \mu_i - \frac{\Delta_i}{3}$ . Recall

$$p_{i,\tau_{i,s}+1} = \mathbb{P}\left(\theta_{i^*}(\tau_{i^*,s} + 1) > \mu_{i^*} - \frac{\Delta_i}{3} | F_{t-1}\right),$$

we observe  $\eta_{i,\tau_{i,s}+1}$  is analogous to  $p_{i,\tau_{i,s}+1}$  in formula, when we replace  $\mu_i$  and  $\widehat{\mu}_i(\tau_{i,s}+1)$  by  $\mu_{i^*}$  and  $\widehat{\mu}_{i^*}(\tau_{i^*,s}+1)$  respectively (i.e. change arm  $i$  by  $i^*$ ). Recall the proof in Lemma C.3, it only depends on the relationship between  $y_i = \mu_{i^*} - \frac{\Delta_i}{3}$  and  $\mu_{i^*}$ , which is the same as  $u_i$  and  $\mu_i$  in  $\eta_{i,\tau_{i,s}+1}$ . Thus, the proof of Lemma C.3 can be directly applied here to bound  $\mathbb{E} \left[ \frac{1}{\eta_{i,\tau_{i,s}+1}} - 1 \right]$ .  $\square$

**Lemma C.12.**

$$\begin{aligned} & \sum_{t=K+1}^T \mathbb{P}(I_t = i^*, E_{i^*}^\theta(t), E_{i^*}^\mu(t)) \\ \leq & T - \sum_{i \neq i^*} \frac{B_i}{2\Delta_i} + \sum_{i \neq i^*} \left( \left( e^{11/4\sigma^2} + \frac{\pi^2}{3} \right) \cdot \frac{72 \ln(T\Delta_i^2) \cdot \max\{1, \sigma^2\}}{\Delta_i^2} + \frac{4}{\Delta_i^2} \right) \end{aligned}$$

*Proof.* We first decompose the target term by thresholding  $n_i(t-1)$  as follows,

$$\begin{aligned} & \sum_{t=K+1}^T \mathbb{P}(I_t = i^*, E_{i^*}^\theta(t), E_{i^*}^\mu(t)) \\ \leq & \mathbb{E} \left[ \sum_{t=K+1}^T \mathbb{I} \left\{ I_t = i^*, E_{i^*}^\theta(t), E_{i^*}^\mu(t), \forall i \neq i^*, n_i(t-1) \geq \frac{B_i}{2\Delta_i} \right\} \right] \\ & + \sum_{t=K+1}^T \mathbb{P} \left( I_t = i^*, E_{i^*}^\theta(t), E_{i^*}^\mu(t), \exists i \neq i^*, n_i(t-1) \leq \frac{B_i}{2\Delta_i} \right) \end{aligned} \quad (25)$$

For the first term in above decomposition, it can be trivially upper bounded by  $T - \sum_{i \neq i^*} \frac{B_i}{2\Delta_i}$ . By union bound and Lemma C.10, we can bound the second term as follows,

$$\begin{aligned} & \sum_{t=K+1}^T \mathbb{P} \left( I_t = i^*, E_{i^*}^\theta(t), E_{i^*}^\mu(t), \exists i \neq i^*, n_i(t-1) \leq \frac{B_i}{2\Delta_i} \right) \\ \leq & \sum_{i \neq i^*} \sum_{t=K+1}^T \mathbb{P} \left( I_t = i^*, E_{i^*}^\theta(t), E_{i^*}^\mu(t), \exists i \neq i^*, n_i(t-1) \leq \frac{B_i}{2\Delta_i} \right) \\ = & \sum_{i \neq i^*} \sum_{t=K+1}^T \mathbb{E} \left[ \mathbb{P} \left( I_t = i^*, E_{i^*}^\theta(t), E_{i^*}^\mu(t), n_i(t-1) \leq \frac{B_i}{2\Delta_i} \middle| \mathcal{F}_{t-1} \right) \right] \\ = & \sum_{i \neq i^*} \sum_{t=K+1}^T \mathbb{E} \left[ \frac{1 - q_{i,t}}{q_{i,t}} \cdot \mathbb{P} \left( I_t = i, E_{i^*}^\theta(t), E_{i^*}^\mu(t), n_i(t-1) \leq \frac{B_i}{2\Delta_i} \middle| \mathcal{F}_{t-1} \right) \right] \\ \leq & \sum_{i \neq i^*} \sum_{t=K+1}^T \mathbb{E} \left[ \frac{1 - q_{i,t}}{q_{i,t}} \cdot \mathbb{P} \left( I_t = i, E_{i^*}^\theta(t), E_{i^*}^\mu(t) \middle| n_i(t-1) \leq \frac{B_i}{2\Delta_i}, \mathcal{F}_{t-1} \right) \right] \\ = & \sum_{i \neq i^*} \sum_{t=K+1}^T \mathbb{E} \left[ \frac{1 - q_{i,t}}{q_{i,t}} \cdot \mathbb{I} \left\{ I_t = i, E_{i^*}^\theta(t), E_{i^*}^\mu(t) \right\} \middle| n_i(t-1) \leq \frac{B_i}{2\Delta_i} \right] \end{aligned}$$

Observe that  $q_{i,t} = \mathbb{P}(\theta_i(t) > w_i | \mathcal{F}_{t-1})$  changes only at the time step after each pull of arm  $i$ . Therefore we can bound

the above term by,

$$\begin{aligned} & \sum_{s=1}^{T-1} \mathbb{E} \left[ \frac{1 - q_{i, \tau_{i,s}+1}}{q_{i, \tau_{i,s}+1}} \cdot \sum_{t=\tau_{i,s}+1}^{\tau_{i,s}+1} \mathbb{I}\{I_t = i, E_{i^*}^\theta(t), E_{i^*}^\mu(t)\} \middle| n_i(\tau_{i,s}) \leq \frac{B_i}{2\Delta_i} \right] \\ & \leq \sum_{s=1}^{T-1} \mathbb{E} \left[ \frac{1 - q_{i, \tau_{i,s}+1}}{q_{i, \tau_{i,s}+1}} \middle| n_i(\tau_{i,s}) \leq \frac{B_i}{2\Delta_i} \right] \end{aligned}$$

Combining Lemma C.11 and Equation (25), we complete the proof.  $\square$

### D. Additional Simulations

We report our simulation results for bounded rewards in this section. Similarly, we also consider a stochastic bandit setting with three arms. The reward of each arm lies within the interval  $[0, 1]$ . The distributions of rewards of each arm are Beta(1, 1), Beta(2, 1) and Beta(3, 1) respectively. In  $\varepsilon$ -Greedy algorithm, we use a different  $\varepsilon_t$  parameter, i.e.  $\varepsilon_t = \min\{1, \frac{20}{t}\}$ . We run simulations for the same settings as those in Section 5 and report the results in Figure 3 and 4. These figures illustrate similar performances for bounded rewards as for unbounded rewards.

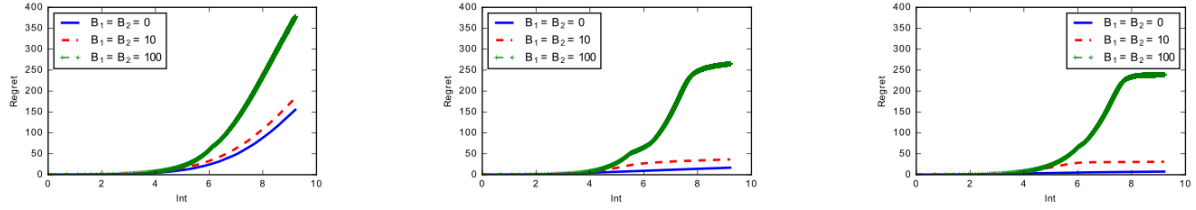

**Figure 3:**  $[0, 1]$  bounded rewards: plots of regret with  $\ln t$  for UCB principal (left),  $\varepsilon$ -Greedy principal (middle), and Thompson Sampling principal (right), as  $B_1$  and  $B_2$  vary. We set  $B_3 = 0$  for the three algorithms.

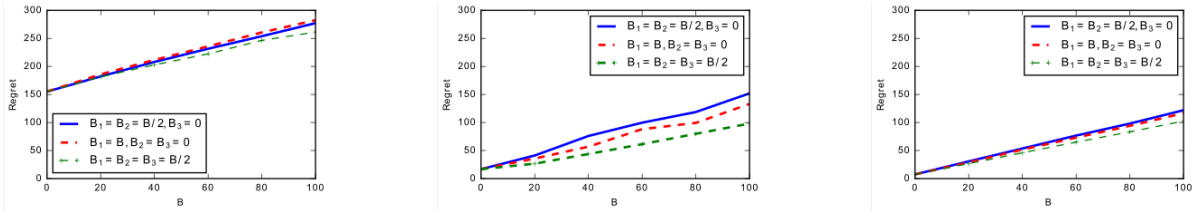

**Figure 4:**  $[0, 1]$  bounded rewards: plots of regret with total budget  $B$  of strategic arms (arm 1 and 2) for UCB principal (left),  $\varepsilon$ -Greedy principal (middle), and Thompson Sampling principal (right), as  $B_i$  varies.
